# Supplementary material for: Glypican-1 is enriched in circulating-exosomes in pancreatic cancer and correlates with tumor burden
Source: PubMed Central journal article supplement (PMC5922373; doi:10.18632/oncotarget.24873), 2018-04-10
Supplement: oncotarget-09-19006-s001.pdf [file oncotarget-09-19006-s001.pdf]

## Glypican-1 is enriched in circulating-exosomes in pancreatic cancer and correlates with tumor burden

### SUPPLEMENTARY MATERIALS

#### Circulating exosomes (crExos)

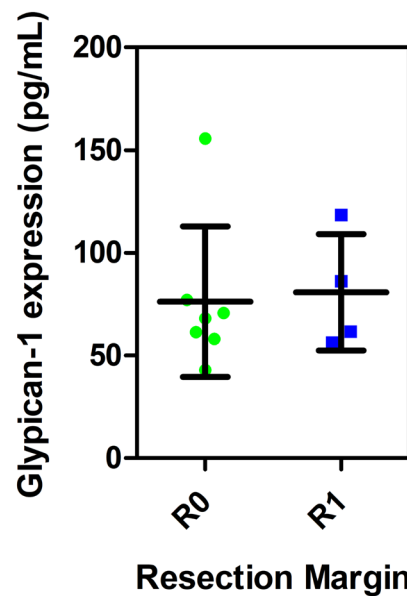

**Supplementary Figure 1: Post-operative circulating exosomal Glypican-1 levels are not associated with resection margin status.** There was no difference in post-operative crExos Glypican-1 levels when comparing R0 ( $n = 7$ ) vs. R1 ( $n = 4$ ) resections.

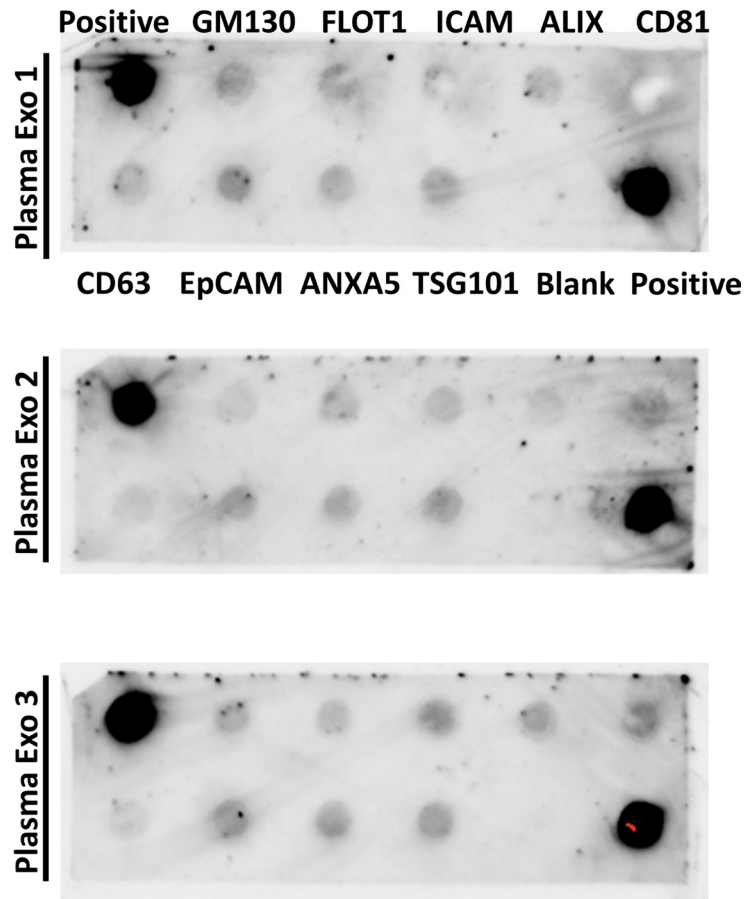

**Supplementary Figure 2: Exo-Check antibody array showing expression of exosomal markers in plasma crExos from patients.** The arrays confirmed expression of exosomal markers in our patient plasma crExos samples, including CD63 and/or CD81. Three representative blots are shown.
